1 Estimates for quality of life loss due to RSV

2

3 David Hodgson MRes<sup>\*1,2</sup>, Katherine E. Atkins PhD<sup>3,4</sup>, Marc Baguelin PhD<sup>3,4,5</sup>, Jasmina  
4 Panovska-Griffiths DPhil<sup>1,2,3,6</sup>, Dominic Thorrington PhD<sup>3,5</sup>, Albert Jan van Hoek PhD<sup>4,7</sup>, Hongxin  
5 Zhao PhD<sup>5</sup>, Ellen Fragaszy MSc<sup>4,8</sup>, Andrew C. Hayward MD<sup>9</sup>, and Richard Pebody MBChB<sup>5</sup>

6

7 <sup>1</sup>Centre for Mathematics, Physics and Engineering in the Life Sciences and Experimental  
8 Biology, University College London, London, UK.

9 <sup>2</sup>Clinical Operational Research Unit, Department of Mathematics, University College London,  
10 London, UK.

11 <sup>3</sup>Centre for the Mathematical Modelling of Infectious Diseases, London School of Hygiene &  
12 Tropical Medicine, London, UK

13 <sup>4</sup>Department of Infectious Disease Epidemiology, Faculty of Epidemiology and Population  
14 Health, London School of Hygiene & Tropical Medicine, London, UK

15 <sup>5</sup>Respiratory Diseases Department, Public Health England, London, UK

16 <sup>6</sup>Department of Applied Health Research University College London, London, UK

17 <sup>7</sup>Department of Epidemiology and Surveillance, National Institute for Public Health and  
18 Environment, Bilthoven, The Netherlands.

19 <sup>8</sup>Centre for Public Health Data Science, Institute of Health Informatics, University College  
20 London, London, UK

21 <sup>9</sup>Department of Epidemiology and Public Health, University College London, London, UK.

22

23 \*Corresponding author.

24 Information for corresponding author:

25 Email: david.hodgson.10@ucl.ac.uk

26 Telephone: 07730432692

27

28 Keywords: Quality-adjusted life years; Respiratory disease; Cost-effectiveness; EQ-5D; Health-  
29 related quality of life; Respiratory Syncytial Virus, Human

30

31 Suggested Reviewers:

32 Joke Bilcke, Philippe Beutels, Alessia Melegaro, Deborah Cromer, Peter White

33

34

35 Research in context

36 Evidence before this study

37 As Respiratory Syncytial Virus (RSV) vaccines are likely to be licensed in the near future, it is  
38 important that their cost-effectiveness (CE) is evaluated. A key requirement of cost-  
39 effectiveness analysis (CEA) is to quantify the Quality Adjusted Life Year (QALY) loss due to  
40 RSV. However, to date, there are no studies using standardised instruments that directly  
41 measure the QALY loss due to an RSV episode. In addition, there are no standardised  
42 instruments that exist for evaluating QALY loss which are aimed specifically at children under  
43 the age of five years—where the majority of the reported disease burden for RSV lies.

44

45 Added value of this study

46 In this study, we designed questionnaires which comprised standardised EQ-5D instruments  
47 and other questions which determined the severity of an RSV episode. The questionnaires were  
48 distributed to households with confirmed RSV episodes in children under five years of age  
49 (confirmed cases). To gather information about RSV episodes across all ages, the  
50 questionnaires requested information about infections in the confirmed cases and also in  
51 suspected RSV episodes in persons five years of age and older in the same household  
52 (suspected cases). Using the questionnaire responses from the suspected cases, we calibrated  
53 a regression model which predicts the Health-Related Quality of Life (HR-QoL) loss (derived  
54 from the EQ-5D instruments) given requested indicators of disease severity including Visual  
55 Analogue Scale (VAS) score loss, effect on school/work days lost, coughing severity, age and  
56 healthcare-seeking behaviour. Combining the derived HR-QoL loss from the regression model  
57 with estimates for the duration of infection from the questionnaires, and information about the  
58 individual-level heterogeneity in symptom severity, allows for the calculation of the QALY loss  
59 across all age groups without the use of EQ-5D instruments.

60

61 Implications of all the available evidence

62 The results of this study suggest that the QALY loss due to an episode of RSV is less than the  
63 QALY loss for an episode of Influenza. Further, by combining our age-specific QALY loss  
64 estimates with existing estimates of RSV burden in the UK, we calculate that 46% of the QALY  
65 loss due to healthcare seeking RSV episodes is due to individuals aged five years and older.  
66 For individuals aged five years and older, our study suggests that only a quarter of persons of  
67 suspected RSV episodes seek healthcare, such that when combined with our QALY loss  
68 estimates for healthcare and non-health care seeking, we calculate that approximately 70% of

69 the QALY loss in this age group cannot be captured by surveillance systems. This has important  
70 implications for economic evaluations of potential vaccination programmes, which primarily  
71 consider the reduction in disease in infants less than one year—where the majority of the  
72 reported severe disease burden lies. We conclude that evaluations of potential non-targeted  
73 vaccination programmes should consider the entire population to accurately capture both the  
74 direct and indirect effects of immunisation.

75 Abstract

76 Introduction

77 A number of vaccines against Respiratory Syncytial Virus (RSV) infection are approaching  
78 licensure. Deciding which RSV vaccine strategy, if any, to introduce, will partly depend on cost-  
79 effectiveness analyses, which compares the relative costs and health benefits of a potential  
80 vaccination programme. Health benefits are usually measured in Quality Adjusted Life Year  
81 (QALY) loss, however, there are no QALY loss estimates for RSV that have been determined  
82 using standardised instruments. Moreover, in children under the age of five years in whom  
83 severe RSV episodes predominantly occur, there are no appropriate standardised instruments  
84 to estimate QALY loss.

85

86 Methods

87 We estimated the QALY loss due to RSV across all ages by developing a novel regression  
88 model which predicts the QALY loss without the use of standardised instruments. To do this, we  
89 conducted a surveillance study which targeted confirmed episodes in children under the age of  
90 five years (confirmed cases) and their household members who experienced symptoms of RSV  
91 during the same time (suspected cases.) All participants were asked to complete questions  
92 regarding their health during the infection, with the suspected cases aged 5–14 and 15+ years  
93 old additionally providing Health-Related Quality of Life (HR-QoL) loss estimates through  
94 completing EQ-5D-3L-Y and EQ-5D-3L instruments respectively. The questionnaire responses  
95 from the suspected cases were used to calibrate the regression model. The calibrated  
96 regression model then used other questionnaire responses to predict the HR-QoL loss without  
97 the use of EQ-5D instruments. The age-specific QALY loss was then calculated by multiplying  
98 the HR-QoL loss on the worst day predicted from the regression model, with estimates for the  
99 duration of infection from the questionnaires and a scaling factoring for disease severity.

100

101 Findings

102 Our regression model for predicting HR-QoL loss estimates that for the worst day of infection,  
103 suspected RSV cases in persons five years and older who do and do not seek healthcare have  
104 an HR-QoL loss of 0.616 (95% CI 0.155–1.371) and 0.405 (95% CI 0.111–1.137) respectively.  
105 This leads to a QALY loss per RSV episode of  $1.950 \times 10^{-3}$  (95% CI  $0.185 \times 10^{-3}$ – $9.578 \times 10^{-3}$ )  
106 and  $1.543 \times 10^{-3}$  (95% CI  $0.136 \times 10^{-3}$ – $6.406 \times 10^{-3}$ ) respectively. For confirmed cases in a  
107 child under the age of five years who sought healthcare, our model predicted a HR-QoL loss on  
108 the worst day of infection of 0.820 (95% CI 0.222–1.450) resulting in a QALY loss per RSV

109 episode of  $3.823 \times 10^{-3}$  (95% CI  $0.492 \times 10^{-3} - 12.766 \times 10^{-3}$ ). Combing these results with  
110 previous estimates of RSV burden in the UK, we estimate the annual QALY loss of healthcare  
111 seeking RSV episodes as 1,199 for individuals aged five years and over and 1,441 for  
112 individuals under five years old.

113

#### 114 Interpretation

115 The QALY loss due to an RSV episode is less than the QALY loss due to an Influenza episode.  
116 These results have important implications for potential RSV vaccination programmes, which has  
117 so far focused on preventing infections in infants—where the highest reported disease burden  
118 lies. Future potential RSV vaccination programmes should also evaluate their impact on older  
119 children and adults, where there is a substantial but unsurveilled QALY loss.

120

#### 121 Funding

122 National Institute for Health Research, the Medical Research Council, EU Horizon 2020 I-  
123 MOVE+, NIHR CLAHRC North Thames.

124 Introduction

125

126 Respiratory Syncytial Virus (RSV) is a leading cause of lower respiratory tract infection in  
127 infants, accounting for three million hospital admissions and 60,000 deaths in children less than  
128 five years of age annually.<sup>1,2</sup> Despite its health burden, there is no licensed vaccine for RSV,  
129 leaving infants vulnerable to infection. However, with over 50 RSV vaccine candidates currently  
130 in preclinical and clinical trials, it is likely that a vaccine will come to market in the near future.<sup>3</sup>  
131 Decisions regarding the introduction of future vaccines will be informed by their projected impact  
132 and cost-effectiveness.

133

134 Cost-effectiveness analysis relies on the existence of measures for morbidity and mortality  
135 associated with RSV episodes expressed in terms of QALY loss.<sup>4</sup> QALY loss is determined by  
136 considering the duration for which the RSV-specific loss of Health-Related Quality of Life (HR-  
137 QoL) is experienced. HR-QoL is evaluated through the use of standardised instruments, such  
138 as EuroQol's EQ-5D that considers the physical, mental and emotional effects of an infection.<sup>5</sup>  
139 The HR-QoL loss due to RSV across all ages through the use of standardised methods has yet  
140 to be performed. Moreover, these methods are not validated to capture the HR-QoL in very  
141 young children, in whom severe RSV episodes predominantly occur.<sup>6</sup>

142

143 In this study, we determined the QALY loss due to an RSV episode across all ages by  
144 conducting a surveillance study among recently confirmed RSV cases aged 0-4 years and  
145 suspected RSV cases in older household members. For both confirmed and suspected  
146 infections, we determined indicators of the severity of the RSV episode using questionnaires  
147 that evaluated loss in Visual Analogue Scale (VAS), lost school/work days (if appropriate),  
148 coughing severity and healthcare-seeking behaviour. For suspected cases in those aged 5-14  
149 and 15+, we used EuroQoL EQ-5D-3L-Y<sup>7-9</sup> and EQ-5D-3L<sup>7,8</sup> questionnaires, respectively, to  
150 also determine the HR-QoL loss. Using these responses, we performed a regression analysis to  
151 evaluate the relationship between the HR-QoL loss and indicators of disease severity. In  
152 addition to estimating QALY loss stratified by healthcare-seeking behaviour and disease  
153 severity in older children and adults, our approach provides a novel method to calculate QALY  
154 loss for RSV episodes in young children.

155

156 Methods

157 Study recruitment

158 During the 2016-17 RSV season, confirmed cases of RSV in children under the age of 5 years  
159 from the previous two weeks were extracted on dates 13th December, 25th December 2016,  
160 and 3rd January 2017 from the Public Health England (PHE) Respiratory DataMart surveillance  
161 (RDMS) system.<sup>10</sup> For all the confirmed cases for whom name, date of birth and National Health  
162 Service (NHS) number were provided, home addresses were obtained from the PHE Patient  
163 Demographic Service. For all obtained home addresses, a questionnaire pack addressed to the  
164 parent or guardian of the confirmed case, was sent the day after its extraction date from the  
165 PHE RDMS system. Each questionnaire pack consisted of three questionnaires, an information  
166 sheet, and a stamped addressed return envelope. The Index Questionnaire requested  
167 information about the recent RSV episode in the confirmed case. The other two questionnaires  
168 requested information about suspected RSV episodes in older household members; those aged  
169 5-14 years (5-14 Questionnaire) and those aged 15 years or older (15+ Questionnaire).  
170 Suspected RSV cases were defined as persons who share a household with the confirmed case  
171 and who experienced an onset of RSV-like symptoms (runny or blocked nose, fever, coughing,  
172 and/or a sore throat) between five days before and five days after the onset of symptoms in the  
173 confirmed case.<sup>11,12</sup> All questionnaire responses which answered at least one question were  
174 included in the data analysis. For the QALY estimate, we excluded responses which did not  
175 indicate a duration of coughing and those that indicated a duration of more than 22 days as  
176 these were extreme outliers in the sample (three times the upper bound of the interquartile  
177 range) in addition to being longer than the duration of infection for RSV observed in existing  
178 studies.<sup>11</sup>

179

180 Questionnaire information

181 The Index Questionnaire was completed by a parent or guardian on behalf of the confirmed  
182 case, the 5-14 Questionnaire on behalf of or by the child themselves and the 15+ Questionnaire  
183 by the adolescent or adult. The Index Questionnaire requested information on (i) the age of the  
184 child, (ii) the confirmed case's symptoms (runny/blocked nose, fever, coughing, sore throat), (iii)  
185 the healthcare seeking behaviour (no healthcare sought, healthcare sought), (iv) coughing  
186 severity (mild/no coughing, severe coughing) and (v) a Visual Analogue Scale (VAS) for the  
187 worst day of the recent infection and the day of questionnaire completion. A VAS was presented  
188 for health from 0 (worst health) to 100 (best health) for both days and the difference between  
189 the VAS scores was defined as the VAS score loss due to an RSV episode. In addition to the

190 questions asked in the Index Questionnaire, the 5-14 and the 15+ Questionnaires also asked  
191 (vi) the time taken off school/work due to symptoms (productivity) and (vii) EuroQol EQ-5D-3L-  
192 Y<sup>7-9</sup> or EQ-5D-3L questionnaires to determine Health-related Quality of Life weight at baseline  
193 and on the worst day of suspected RSV infection,<sup>7,8</sup> respectively. See Appendix I for full  
194 questionnaire packs.

195

196 The EuroQol ED-5D-3L-Y<sup>7-9</sup> and EQ-5D-3L<sup>7,8</sup> questionnaires use a UK specific Time Trade-Off  
197 scoring tariff to determine the HR-QoL weight according to five dimensions: mobility, self-care,  
198 usual activities, pain/discomfort, and anxiety/depression. Respondents were asked to complete  
199 the EQ-5D responses for their health or the health of the child on the day they received the  
200 questionnaire (baseline) and for the worst day of infection. We refer to this HR-QoL weight on  
201 the worst day of infection as the raw maximum HR-QoL weight for an RSV episode and the  
202 difference in the HR-QoL weights between the baseline and the worst day of infection as the  
203 raw maximum HR-QoL loss.

204

205 Regression model

206 EQ-5D instruments are not validated for children under five years of age so we cannot obtain  
207 estimates for the raw maximum HR-QoL loss in the confirmed cases. Therefore, using the  
208 responses from the suspected cases, we used a mixture model approach to estimate the  
209 maximum HR-QoL loss as a function the independent variables—age (5–14 years, 15 years  
210 and older), coughing severity, healthcare seeking behaviour, productivity and VAS score loss.  
211 We classified the adjusted maximum HR-QoL loss for each RSV episode as either severe  
212 (above a threshold value  $h$ ) or mild (equal to or below  $h$ ), with probability  $p$  and  $1-p$  respectively.  
213 For suspected cases with a raw maximum HR-QoL loss above  $h$ , we used a linear regression  
214 model to estimate the adjusted maximum HR-QoL loss in severe episodes as a function of the  
215 independent variables. Similarly, for suspected cases with a raw maximum HR-QoL loss equal  
216 to or below  $h$ , we used a log-transformed linear regression model to estimate the adjusted  
217 maximum HR-QoL loss in mild episodes as a function of the independent variables. The raw  
218 maximum HR-QoL loss values were log-transformed to prevent negative adjusted maximum  
219 HR-QoL loss values. Finally, by transforming the raw maximum HR-QoL loss to a binary  
220 variable—0 for mild infections and 1 for severe infection—we used a logistic regression to  
221 calculate the probability of a severe episode  $p$  as a function of the independent variables.

222



223 The final three regression models contain those variables that significantly influenced the  
224 adjusted maximum HR-QoL at the 5% significant level (Appendix II). The variance of the full  
225 mixture model was estimated by simulation using prediction intervals for the linear and log-  
226 transform linear model and confidence intervals for the logistic regression model. The threshold  
227 value  $h$  was estimated by finding the minima of the fitted mixture distribution for the raw  
228 maximum HR-QoL loss values. To assess the accuracy of the model, we compared the  
229 distributions derived from between the raw and adjusted maximum HR-QoL loss for the  
230 suspected cases for each of the independent variables considered in the model calibration. The  
231 regression analysis, hypothesis testing for significant covariates, and stochastic simulation was  
232 performed in R (v. 3.3.2), and plotting was performed in Mathematica (v. 10.3.0.0).

233

234 Quality-adjusted life year (QALY) loss due to an RSV episode

235 For confirmed cases in children under the age of five years and suspected cases in persons  
236 aged five years and older, we estimated each respondent's QALY loss by multiplying the  
237 adjusted maximum HR-QoL life loss by the duration of coughing and a scaling factor for disease  
238 severity throughout this duration. We estimated the distribution of coughing duration for  
239 confirmed and suspected cases separately by pooling responses, respectively (Appendix II). We  
240 estimated the scaling factor for disease severity using detailed data from the Flu Watch study,<sup>13</sup>  
241 Flu Watch is a community cohort study in which householders were asked to record all  
242 respiratory infections and submit a nasal swab for Polymerase Chain Reaction (PCR) based  
243 identification of respiratory viruses over winter seasons. In 2010/11 participants or adult carers  
244 were also asked to complete daily EQ-5D instruments during each day of illness. These five  
245 sets of responses resulted in daily HR-QoL estimates from five community cases of confirmed  
246 RSV (ages 16–45), from which we quantified five estimates of the scaling factor of disease  
247 severity as the average daily severity of the symptoms relative to the maximum HR-QoL loss.  
248 We then took the mean of these values to estimate the scaling factor for disease severity. It is  
249 not possible to obtain estimates for the QALY loss in confirmed infections who are under the  
250 age of five years who did not seek healthcare as the confirmed cases were recruited into the  
251 study conditional on them seeking healthcare. Therefore, to gain QALY loss estimates we  
252 assume that the ratio of QALY loss for people over five years who seek healthcare to those that  
253 do not is the same independent of age.

254

255

256

257 Total QALY loss due to RSV for confirmed infections

258 We estimated the annual QALY loss due to RSV infections in the UK for healthcare seeking  
259 RSV episodes in children under five years old and for individuals five years and older by  
260 multiplying the respective QALY loss per episode calculated in this study with a previous  
261 estimate of the respective age-specific annual number of GP consultations and hospital  
262 admissions due to RSV in the UK.<sup>14,15</sup>

263

264 Ethics approval

265 In accordance with The Health Service (Control of Patient Information) Regulations 2002 No.  
266 1438 Section 251 Regulation 3. Public Health England may process confidential patient  
267 information with a view to monitoring and managing; outbreaks of communicable disease;  
268 incidents of exposure to communicable disease and the delivery, efficacy, and safety of  
269 immunisation programmes.<sup>16</sup> All questionnaires were returned from households and stored at  
270 PHE were anonymised.

271

272 Role of the funding source

273 None.

274

275

## 276 Results

### 277 Questionnaire responses

278 We sent out 770 questionnaire packs between 15 December 2016 and 4 January 2017 and  
279 received 122 responses by 28 February 2017 (response rate of 16%). We found that, when  
280 stratified by year of age, the age distribution of the confirmed cases who responded was similar  
281 to the age distribution of the contacted confirmed RSV index cases. However, when stratified by  
282 month of age in the first year of life, we oversampled infants 3–4 months old and undersampled  
283 infants 1–2 month old (**Figure 1a and b**). In the 122 households, suspected cases were  
284 reported in 33 (27.0%) persons aged 5–14 years old and 54 (44.2%) of persons aged 15 years  
285 or older.

286  
287 In suspected cases, 25/33 (75.8%) of 5–14-year-olds and 48/54 (88.9%) of respondents aged  
288 15 years and older completed all questions in the EQ-5D-3L and EQ-5D-Y instruments,  
289 respectively, to allow the calculation of the raw maximum HR-QoL weight. To estimate the  
290 adjusted maximum HR-QoL loss, we included all questionnaires from 5-14 years old and person  
291 15 years and older (21/33 (63.6%) and 40/58 (69.0%) respectively) which, in addition to  
292 completing all five dimensions of health status in EQ-5D instruments, completed answers for  
293 age, productivity loss, healthcare-seeking behaviour, coughing severity and VAS score loss. To  
294 estimate the adjusted maximum HR-QoL loss in the confirmed cases, we used 108/122 (88.5%)  
295 of the questionnaires which provided the answers to coughing severity, productivity loss,  
296 healthcare-seeking behaviour, and VAS score loss. Duration of coughing was provided for  
297 98/122 (80.3%) and 43/87 (49.4%) of confirmed and suspected cases respectively.

298  
299 In the questionnaire responses from the suspected cases, we found that 21/33 (63.6%) of  
300 children aged 5-14 years old, and 43/54 (79.9%) of persons aged 15 years and older did not  
301 seek any healthcare because of their suspected RSV episode (**Table 1**). Further, we found that  
302 17/33 (51.5%) children aged 5–14 years old took time off school and 9/54 (16.6%) of persons  
303 aged 15 years and older took time off work or school due to their suspected RSV infection, both  
304 with a median time off of 2 days (range 1–10) (**Table 1**). The EQ-5D-Y instruments suggested  
305 that for children aged 5-14 years old the dimensions of healthcare which were most affected by  
306 RSV were the effect on usual activities (72%), pain/discomfort (76%) and anxiety/depression  
307 (84%). The EQ-5D-3L responses for respondents aged 15 years and older suggested similar  
308 results with RSV affecting respondents' usual activities (54.2%), causing pain/discomfort  
309 (36.0%) and anxiety and depression (32.0%) (**Figure 2**). After using the UK TTO scoring tariff,

310 the raw HR-QoL weight for the worst day of infection for children aged 5–14 years old and  
311 persons 15 years and older was 0.630 (range -0.429–1.000) and 0.630 (range -0.429–1.000)  
312 respectively. (**Table S7**). This led to a raw maximum HR-QoL loss of 0.456 (range 0.0–1.170)  
313 and 0.358 (range 0–0.998) for 5-14 and 15 years and older respectively. As there was no  
314 significant difference between the raw maximum HR-QoL loss between 5–14 years old and  
315 persons 15 years (Kolmogorov-Smirnov test,  $p = 0.291$ ), all HR-QoL and QALY results were  
316 pooled for further analysis.

317

318 Adjusted maximum HR-QoL loss

319 We found the threshold value for the maximum HR-QoL loss, above which infections are  
320 considered severe, to be  $h = 0.582$  (**Figure S1**). Using linear regression, we found that VAS  
321 score loss significantly adjusted the adjusted maximum HR-QoL loss for mild infections ( $p <$   
322  $0.001$ ), and healthcare-seeking behaviour (none or any) for severe infection ( $p = 0.0012$ ). Using  
323 logistic regression, we found that coughing severity (none/mild or severe) significantly adjusted  
324 the probability of severe infections ( $p < 0.001$ ) (**Table S2 and Figures S3–S6**).

325

326 Our full mixture model estimated the adjusted maximum HR-QoL loss in suspected cases aged  
327 five years and older who did and did not seek health care as 0.616 (95% CI 0.155–1.371) and  
328 0.405 (95% CI 0.111–1.137) respectively. We used the calibrated mixture model to estimate the  
329 adjusted maximum HR-QoL loss for confirmed cases less than five years of age, who sought  
330 health care as 0.820 (95% CI 0.222–1.450). In assessing the model accuracy, we found the  
331 difference between the means of the HR-QoL loss between the raw and adjusted maximum HR-  
332 QoL loss for each of the independent variables was 0.063 (range 0.026–0.154) (**Figure 3**).

333

334 Quality-Adjusted Life Year loss

335 The duration of coughing in children under five years old (median 7 days (range 1–22)) was  
336 longer than in those aged five years and older (median 4 days (range 1–20)) (**Figure S7**). The  
337 daily RSV HR-QoL weights from Flu Watch<sup>13</sup> suggest that for half of the duration of symptoms,  
338 the HR-QoL weight decreases linearly to the minimum HR-QoL weight, and then linearly  
339 increases to baseline health. We thus estimated the mean scaling factor for disease severity as  
340 0.25. By calculating QALY loss as the product of the adjusted maximum HR-QoL loss, duration  
341 of coughing and the scaling factor for disease severity we quantified the QALY loss for  
342 suspected episodes in persons aged five years and older as  $1.950 \times 10^{-3}$  (95% CI (0.185–9.578  
343  $\times 10^{-3}$ ) for those who seek healthcare and  $1.543 \times 10^{-3}$  (95% CI 0.136–6.406  $\times 10^{-3}$ ) for those

344 who do not seek healthcare. For confirmed cases in children less than five years old, all of  
345 whom sought healthcare, the QALY loss per episode was  $3.823 \times 10^{-3}$  ( $0.492-12.766 \times 10^{-3}$ ),  
346 **(Tables 2, S8, S9).**

347

348 Implications for economic evaluations

349 Previous studies have estimated the combined number of annual GP consultations and hospital  
350 admissions due to RSV in the UK as 110,016 (range 62,414–157,617) for children aged 5–17  
351 years and 505,046 (range 336,305–604,873) for adults.<sup>14,15</sup> Using our QALY loss estimate of  
352  $1.950 \times 10^{-3}$  for healthcare seeking episodes, this results in a mean annual loss of 1,199 (range  
353 777–1487) QALYs for healthcare seeking infections in individuals five years and older in the UK.  
354 Similarly, for children under five years, the estimated number of both GP consultations and  
355 hospital admissions due to RSV in the UK is 369,302 (range 253,825–467,277).<sup>15</sup> Using our  
356 estimate of  $3.823 \times 10^{-3}$  for the QALY loss for healthcare seeking episodes in children under the  
357 age of five years, this results in a mean annual QALY loss of 1,411 (range 970–1786). These  
358 results suggest that 45.9% of the annual QALY loss due to RSV episodes seeking healthcare is  
359 attributable to persons five years and older.

360

361 Further, using our result that 25% of individuals aged five years and older seek healthcare, we  
362 estimate that there are approximately 1.8 (range 1.6–3.0) million RSV infections in the UK  
363 annually that will not be captured in a healthcare-focussed surveillance system. The mean  
364 annual QALY loss associated with these non-surveilled episodes for persons five years and  
365 older is around 2,900 (range 2,460–4,706), suggesting that approximately 29% of the QALY  
366 loss in this age group can only be captured by community surveillance.

367 Discussion

368 In this study, we quantified the quality of life (QALY) loss associated with RSV episodes. For  
369 children over five years old and adults, we found that the QALY loss can be accurately predicted  
370 by whether there was severe coughing, whether healthcare was sought, and Visual Analogue  
371 Scale score loss. We used a novel statistical model to evaluate the QALY loss in children under  
372 five years old, in whom the majority of severe RSV episodes occur. We found the QALY loss in  
373 children under the age of five years who sought healthcare is  $3.823 \times 10^{-3}$  (95% CI 0.492–  
374 12.766), and for persons five years and older to be  $1.950 \times 10^{-3}$  (95% CI 0.185–9.578) for those  
375 who seek healthcare and  $1.543 \times 10^{-3}$  (95% CI 0.136–6.406) and for those who do not seek  
376 healthcare. In addition, we found the 73.6% of infections in persons over the age of five did not  
377 seek healthcare, and 30.0% took time off due to their infection.

378  
379 Our study has some limitations. First, because the confirmed cases were recruited into the  
380 study conditional on them seeking healthcare, we could not estimate the QALY loss in children  
381 less than five years old who did not seek healthcare. To overcome this limitation, we assume  
382 that the ratio of QALY loss for people over five years who seek healthcare to those that do not is  
383 the same independent of age. To collect data directly on the QALY loss in children under five  
384 who do not seek healthcare would require a much larger and more intensive community-based  
385 study with frequent testing throughout an RSV season. Second, suspected cases may have  
386 experienced non-RSV respiratory disease. However, as previous studies have shown that  
387 around 70% of households experience a second infection in either siblings or parents during the  
388 same time as an infant, we think it is reasonable to assume that the majority of suspected cases  
389 are in fact RSV.<sup>17,18</sup> Finally, completing questionnaires some days after symptoms may be  
390 subject to recall bias as our estimates for the maximum HR-QoL life loss for persons aged 15  
391 years and older (0.452 (95% CI 0.177–1.222)) are larger to the maximum HR-QoL loss  
392 estimated during the infection in the Flu Watch study (range 0.107–0.309).

393  
394 Our study is the first to estimate the QALY loss due to acute RSV infection across all ages. In  
395 addition, we developed a novel method to estimate QALY loss due to RSV in young children for  
396 whom standardised instruments for deriving HR-QoL estimates are not appropriate. Thus our  
397 method leverages the use of standardised instruments such as EQ-5D to quantify QALY loss  
398 using more easily measurable variables of infection in young children. In particular, we derived a  
399 method for determining the maximum HR-QoL loss due to RSV infection. We found two  
400 previous studies which also estimated the HR-QoL due to RSV infection both of which suffer

401 from shortcomings. The first is a Time Trade-off study which derived HR-QoL life estimates  
402 using responses from participants about a hypothetical illness that they, or their child, had not  
403 experienced.<sup>19,20</sup> Our study is advantageous because the adjusted maximum HR-QoL loss  
404 values are the subjective HR-QoL estimates from people who have, or suspected to have  
405 experienced an RSV infection. The second study estimates the HR-QoL using EQ-5D  
406 instruments, however the results are derived by describing the current condition of a five-year-  
407 old child with a history of RSV—it is not a health utility for an RSV episode. Therefore, this  
408 estimate is for RSV sequelae, which can complement our estimate for RSV infections derived in  
409 this study. Despite the limitations in this study, it is the primary source of HR-QoL estimates for  
410 existing RSV cost-effectiveness analysis.<sup>19</sup> Using HR-QoL loss for RSV sequelae of acute RSV  
411 infection in cost-effectiveness analysis could underestimate the impact of potential intervention  
412 strategies. We recommend that future cost-effectiveness analyses additionally use directly  
413 obtained HR-QoL loss estimates for RSV episodes, such as those presented in this paper, to  
414 ensure that the cost-effectiveness of potential intervention programmes is accurately  
415 determined.

416

417 We compared the adjusted maximum HR-QoL loss found in the novel statistical model with the  
418 raw maximum HR-QoL loss for independent variables used to calibrate the transmission model  
419 to assess the model accuracy. We found that the difference between the means of the two  
420 methods of calculating the maximum HR-QoL was less than 0.1 HR-QoL loss for 66% of the  
421 independent variables considered, implying that the model predicts with accuracy.

422

423 We estimated a QALY loss of  $1.758 \times 10^{-3}$  (95% CI  $0.150-7.303 \times 10^{-3}$ ) due to a suspected  
424 RSV episode in persons aged five years and older. Comparing our study to the Flu Watch  
425 prospective cohort study, we found that the QALY loss for an RSV episode is less than the  
426 QALY loss for a confirmed Influenza H1N1 episode, which is estimated to have mean  $4.4 \times 10^{-3}$   
427 (range  $-2.5-18.2 \times 10^{-3}$ ) across all ages.<sup>22</sup> However, our estimates are similar to the QALY loss  
428 for cases of respiratory disease in the same study which were not confirmed to be Influenza, but  
429 were confirmed to suffer from a fever and reported coughing/sore throat (mean  $2.6 \times 10^{-3}$  (range  
430  $-69.2-39.7 \times 10^{-3}$ ) across all ages). We cannot compare the QALY loss due to the confirmed  
431 RSV episodes in children under the age of five ( $3.823 \times 10^{-3}$  (95% CI  $0.492-12.766 \times 10^{-3}$ )),  
432 with values from the Flu Watch because the confirmed RSV infections were recruited dependent  
433 on an infection being severe and requiring medical attention. We therefore compare estimates  
434 to a different study which suggests that these RSV severe episodes are milder than hospitalised



435 Influenza episodes, (QALY loss of  $6.0 \times 10^{-3}$  (range  $5.1\text{--}6.9 \times 10^{-3}$ )) but similar in severity to  
436 non-Influenza episodes who suffer Influenza-like illness (ILI) and present at a clinical interface  
437 ( $4.0 \times 10^{-3}$  (range  $3.4\text{--}4.6 \times 10^{-3}$ )).<sup>23</sup> These comparisons suggest that, though Influenza has a  
438 higher QALY loss per episode, the QALY loss due to an RSV episode is comparable to previous  
439 QALY loss estimates for persons with general ILI. In a wider context, comparing with QALY  
440 estimates derived via EQ-5D instruments with UK TTO scoring tariff for measles, another  
441 disease with high burden in children, the QALY loss was 0.019 (95% CI 0.016–0.022) per  
442 episode.<sup>24</sup>

443  
444 We estimated that 46% of the QALY loss associated with healthcare seeking episodes was  
445 attributable to individuals five years and older. This result suggests that neglecting QALY loss in  
446 older children and working age adults might substantially underestimate the impact of a  
447 potential RSV vaccine programme. Further, RSV is characterised by high levels of household  
448 transmission,<sup>25,26</sup> which points to a need to evaluate both the direct and herd protection effects  
449 of potential vaccination strategies into impact assessments. Together, this evidence suggests  
450 that integrating transmission models into economic evaluations will be important to accurately  
451 estimate the impact of potential vaccine programmes across the entire population.

452  
453 In this study we are only able to directly estimate the QALY loss for children under five years old  
454 who do not seek healthcare, we cannot evaluate the frequency at which this occurs. However,  
455 we expect the probability of healthcare seeking in children under the age of five years to be  
456 higher than the 25% reported in those aged five years and older for two reasons: because  
457 infections in infants are generally more severe, with higher rates of symptomatic infections,<sup>27</sup>  
458 and because of possible increased parental healthcare seeking for infants.<sup>28</sup> Regardless, the  
459 healthcare seeking behaviour for both children and adults will likely depend on the region and  
460 careful consideration will need to be taken into account in economic evaluations.

461  
462 In summary, we estimated the QALY loss due to an RSV episode in confirmed cases in children  
463 less than five years old and suspected cases in persons five years old or older. The QALY loss  
464 due to an RSV episode is less than the QALY loss due to an influenza episode. In addition, RSV  
465 infections in individuals aged five years and older account for 46% of the annual QALY loss  
466 attributable to healthcare seeking episodes in the UK. Consequently, economic evaluations of  
467 potential vaccine programmes should consider the effect on reducing incidence not only where  
468 the severe disease burden lies, but across the across the whole population.



469 Declaration of interests

470 DH: None

471 KA: None

472 MB: None

473 JPG: None

474 DT: None

475 AJvH: None

476 HZ: None

477 EF: None

478 AH: None

479 RP: None

480

481 Acknowledgements

482 KEA acknowledges funding from the National Institute for Health Research Health Protection  
483 Research Unit in Immunisation at the London School of Hygiene and Tropical Medicine in  
484 partnership with Public Health England. DH received funding from a Medical Research Council  
485 PhD Studentship (administered through CoMPLEX University College London). DT received  
486 funding from the European Union's Horizon 2020 research and innovation programme under  
487 grant agreement #634446 for the I-MOVE+ (Integrated MoGnitoring of Vaccines in Europe)  
488 project. JPG's research is supported by the National Institute for Health Research (NIHR)  
489 Collaboration for Leadership in Applied Health Research and Care North Thames at Bart's  
490 Health NHS Trust (NIHR CLAHRC North Thames). The views expressed are those of the  
491 authors and not necessarily those of the National Health Service, the Medical Research  
492 Council, National Institute for Health Research, Department of Health, European Union, or  
493 Public Health England. We thank Nick Andrews for helpful advice and guidance with the  
494 statistical analyses.

495

496 Author's contributions

497 DH, KEA, MB, JPG, AT, AJvH, RP conceived and designed the surveillance study. DH, DT, and  
498 HZ were involved in the data extraction, the distribution of the questionnaires, and data input of  
499 the questionnaire responses. EF and AH were involved in collecting and interpreting the Flu  
500 Watch data. DH performed the statistical analysis with interpretations from KEA, MB, JPG, RP.  
501 DH, KA, RP, MB, JPG drafted the manuscript with critical revisions from DT, AJvH, HZ, EF, AH.

502

503 Tables

|                                                      | *<br>Aged 0–4 years (n =<br>122) (%) | Aged 5–14 years (n<br>= 33) (%) | Aged 15 years and<br>over (n = 54) (%) |
|------------------------------------------------------|--------------------------------------|---------------------------------|----------------------------------------|
| <b>Symptoms</b>                                      |                                      |                                 |                                        |
| Runny/blocked nose                                   | 96 (78.7)                            | 28 (84.8)                       | 43 (79.6)                              |
| Fever                                                | 70 (57.4)                            | 18 (54.5)                       | 22 (40.7)                              |
| Coughing                                             | 110 (90.2)                           | 27 (81.8)                       | 51 (94.4)                              |
| Sore throat                                          | 36 (29.5)                            | 17 (51.5)                       | 38 (70.4)                              |
| <b>Coughing severity</b>                             |                                      |                                 |                                        |
| No effect on daily activities                        | 16 (13.1)                            | 10 (30.3)                       | 8 (14.8)                               |
| Mild effect on daily activities                      | 34 (27.9)                            | 15 (45.5)                       | 32 (59.3)                              |
| Severe effect on daily activities                    | 93 (76.2)                            | 4 (12.1)                        | 8 (14.8)                               |
| <b>Coughing severity duration</b>                    |                                      |                                 |                                        |
| No effect on daily activities (median,<br>range)     | 4 days (1–14)                        | 10 days (10–10)                 | 14.5 days (1–28)                       |
| Mild effect on daily activities (median,<br>range)   | 3.5 days (1–14)                      | 3 days (1–9)                    | 5.5 days (1–28)                        |
| Severe effect on daily activities<br>(median, range) | 6.5 days (1–35)                      | 3 days (1–4)                    | 7 days (3–10)                          |
| <b>Healthcare seeking</b>                            |                                      |                                 |                                        |
| Phone/email NHS 111 / NHS 24 /<br>NHS Choices        | 39 (32.0)                            | 2 (6.1)                         | 2 (3.7)                                |
| Phone/email GP—response from the<br>receptionist     | 20 (16.4)                            | 2 (6.1)                         | 2 (3.7)                                |

|                                                       |             |               |              |
|-------------------------------------------------------|-------------|---------------|--------------|
| Phone/email GP—response from the doctor or nurse      | 20 (16-4)   | 2 (6-1)       | 2 (3-7)      |
| Visit a GP or nurse                                   | 83 (68-0)   | 10 (30-3)     | 10 (18-5)    |
| Visit A&E department (including out of hours service) | 71 (58-2)   | 3 (9-1)       | 1 (1-9)      |
| Admitted to hospital                                  | 103 (84-4)  | 1 (3-0)       | 1 (1-9)      |
| None                                                  | 0 (0-0)     | 21 (63-6)     | 43 (79-6)    |
| <b>Productivity</b>                                   |             |               |              |
| Individuals reporting taking time off work or school  | —           | 17 (51-5)     | 9 (16-7)     |
| Duration of time off work or school (median, range)   | —           | 2 days (1–10) | 2 days (1–7) |
| <b>VAS score</b>                                      |             |               |              |
| Baseline (median, range)                              | 90 (30–100) | 95 (10–100)   | 95 (50–100)  |
| Worst day (median, range)                             | 20 (0–85)   | 50 (5–85)     | 50 (0–90)    |
| Loss (median, range)                                  | 65 (10–100) | 38 (0–90)     | 35 (10–85)   |

504 **Table 1** Summary of index, 5-14, and 15+ Questionnaire responses. Numbers in parentheses is  
 505 the percentage unless otherwise stated. VAS, visual analogue scale.

506 \* Conditional on ascertaining a confirmed case through GP/hospitalisation.

507

508

509

510

511

512

513

514

|                                          | Under five years of age*             | Five years of age and older          |
|------------------------------------------|--------------------------------------|--------------------------------------|
| <b>Mean maximum HR-QoL loss (95% CI)</b> |                                      |                                      |
| <i>Coughing severity</i>                 |                                      |                                      |
| None or mild                             | 0.499 (0.148–1.482)                  | 0.382 (0.111–1.113)                  |
| Severe                                   | 0.878 (0.344–1.443)                  | 0.785 (0.280–1.368)                  |
| <i>Healthcare seeking behaviour</i>      |                                      |                                      |
| None                                     | 0.539 (0.144–0.952)**                | 0.405 (0.111–1.137)                  |
| Seek healthcare                          | 0.820 (0.222–1.450)                  | 0.616 (0.155–1.371)                  |
| <b>Mean QALD loss (95% CI)</b>           |                                      |                                      |
| <i>Coughing severity</i>                 |                                      |                                      |
| None or mild                             | 0.845 (0.097–3.292)                  | 0.528 (0.050–2.167)                  |
| Severe                                   | 1.496 (0.221–4.841)                  | 1.103 (0.126–4.149)                  |
| <i>Healthcare seeking behaviour</i>      |                                      |                                      |
| None                                     | 1.00 (0.141–3.652)**                 | 0.565 (0.049–2.349)                  |
| Seek healthcare                          | 1.391 (0.179–4.617)                  | 0.866 (0.071–3.508)                  |
| <b>Mean QALY loss (95% CI)</b>           |                                      |                                      |
| <i>Coughing severity</i>                 |                                      |                                      |
| None or mild                             | $2.336 \times 10^{-3}$ (0.269–9.255) | $1.448 \times 10^{-3}$ (0.135–5.928) |

|                                     |                                         |                                       |
|-------------------------------------|-----------------------------------------|---------------------------------------|
| Severe                              | $4.098 \times 10^{-3}$ (0.624–13.141)   | $2.990 \times 10^{-3}$ (0.346–11.387) |
| <i>Healthcare seeking behaviour</i> |                                         |                                       |
| None                                | $3.024 \times 10^{-3}$ (0.329–10.098)** | $1.543 \times 10^{-3}$ (0.136–6.406)  |
| Seek healthcare                     | $3.823 \times 10^{-3}$ (0.492–12.766)   | $1.950 \times 10^{-3}$ (0.185–9.578)  |

515 **Table 2** HR-QoL, QALD, and QALY loss for significant factors in the confirmed cases in children  
516 less than five years of age, and in the suspected cases in children five years and older.

517 \*Conditional on ascertaining a confirmed case through GP/hospitalisation.

518 \*\*Implicitly estimated by assuming the proportional reduction in HR-QoL loss and QALY loss is  
519 the same as observed in suspected infections in persons over five years of age.

520

521 Figures

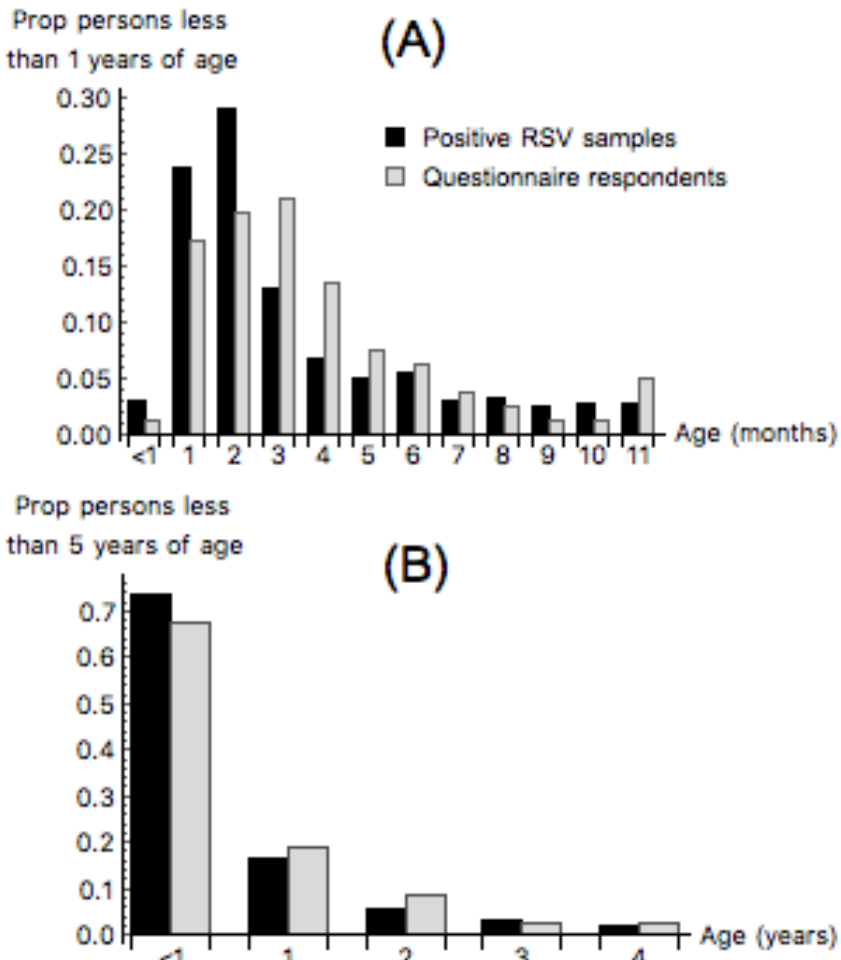

522

523 **Figure 1:** Age of confirmed RSV samples in PHE database (N=770, black) and of returned for  
524 analysis (N=122, gray).

525

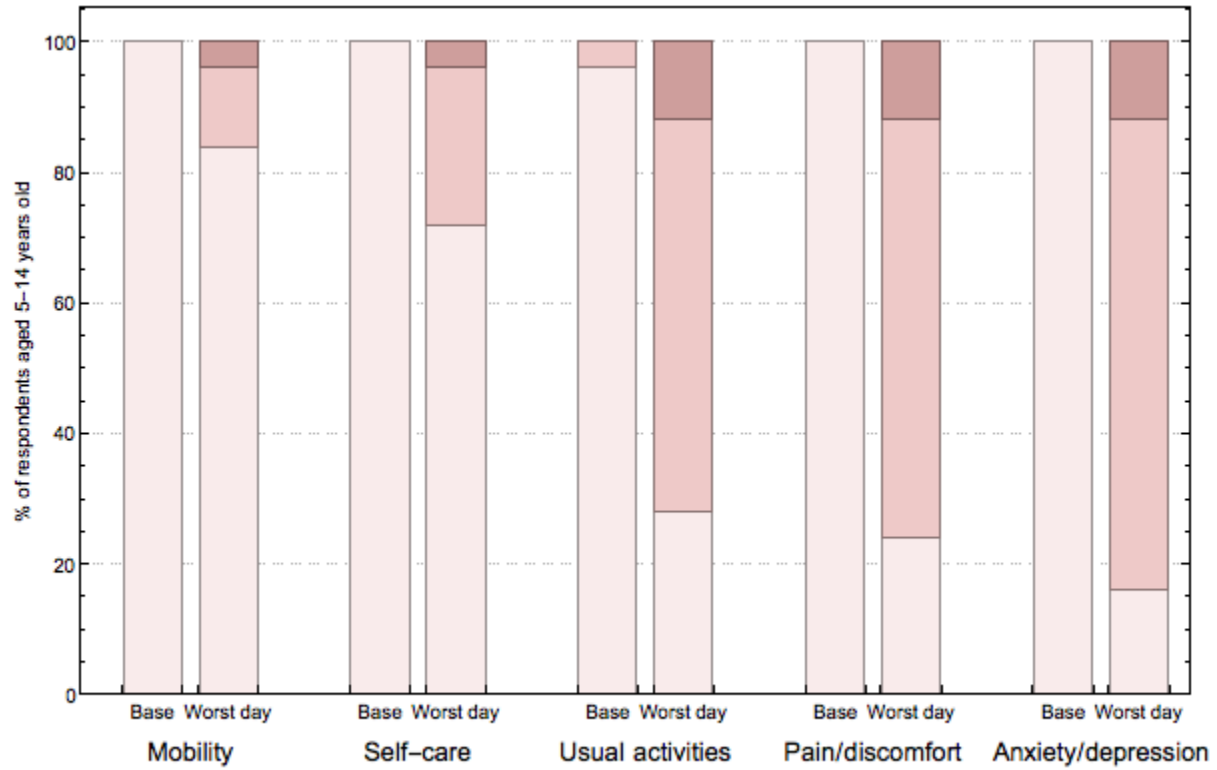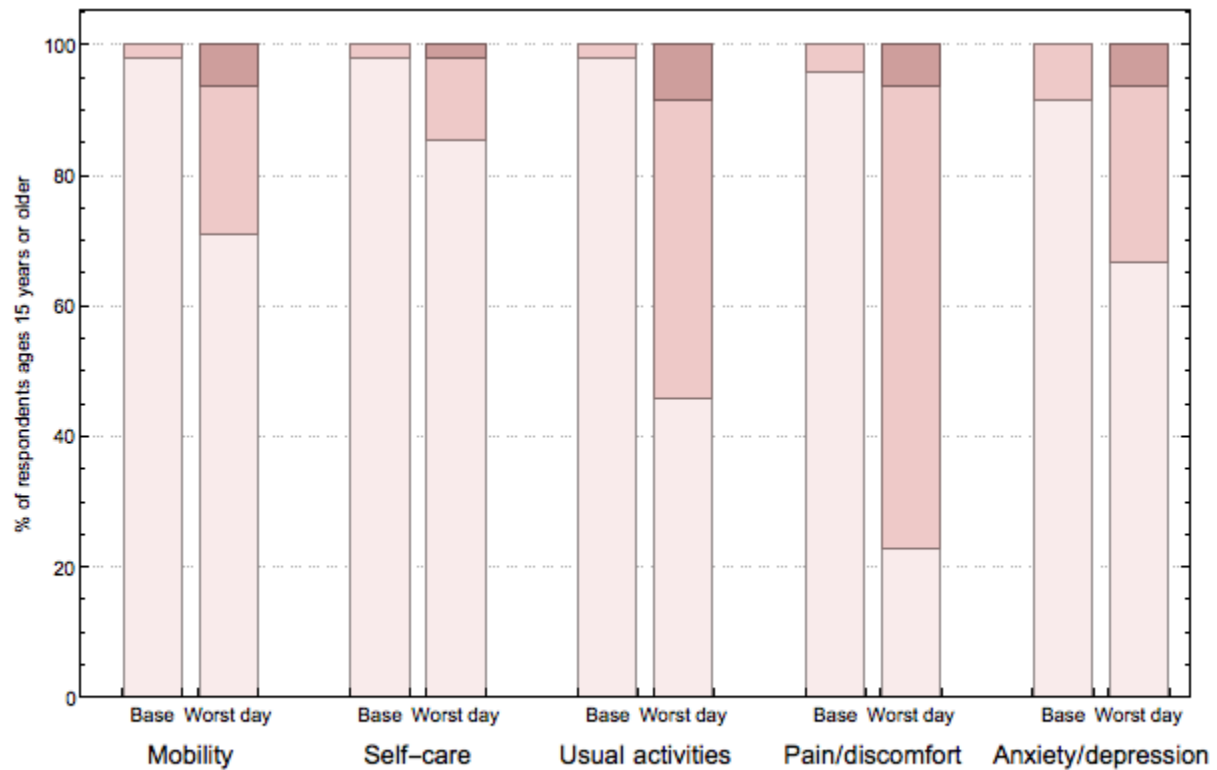

□ No problems □ Some problems ■ Severe problems

527 **Figure 2:** Responses from the EQ-5D-3L-Y and EQ-5D-3L instruments on the base and worst  
528 day of health for respondents aged 5-14 years old (top) and 15+ years old (bottom).  
529

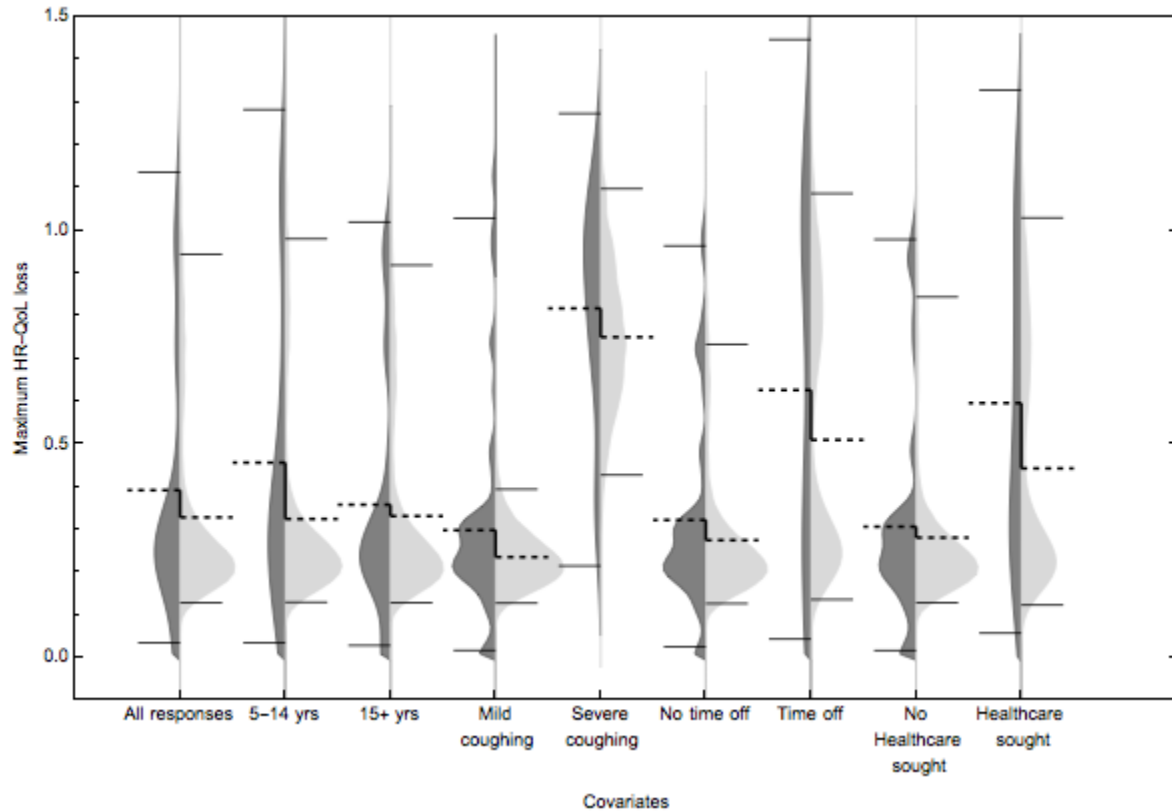

530  
531 **Figure 3:** Distributions of the maximum HR-QoL loss from the EQ-5D instruments (dark gray)  
532 and estimated using statistical model (light gray.) The dashed line shows the mean, and solid  
533 thin lines indicate the upper and lower 95% CI.  
534  
535



536 References

- 537 1 Shi T, McAllister DA, O'Brien KL, et al. Global, regional and national disease burden  
538 estimates of acute lower respiratory infections due to respiratory syncytial virus in young  
539 children in 2015. *Lancet* 2017; 390: 946–58.
- 540 2 Nair H, Nokes DJ, Gessner BD, et al. Global burden of acute lower respiratory infections  
541 due to respiratory syncytial virus in young children: a systematic review and meta-analysis.  
542 *Lancet* 2010; 375: 1545–55.
- 543 3 Path. RSV Vaccine and mAb Snapshot. 2017.  
544 [http://www.path.org/publications/files/CVIA\\_rsv\\_snapshot\\_final.pdf](http://www.path.org/publications/files/CVIA_rsv_snapshot_final.pdf).
- 545 4 Pettitt DA, Raza S, Naughton B, Roscoe A, Ramakrishnan A, Ali A, Davies B, Dopson  
546 S, Hollander G, Smith J, and Brindley DA. The Limitations of QALY: A Literature Review. *J*  
547 *Stem Cell Res Ther* 2016; 06. DOI:10.4172/2157-7633.1000334.
- 548 5 Whitehead SJ, Ali S. Health outcomes in economic evaluation: The QALY and utilities.  
549 *Br Med Bull* 2010; 96: 5–21.
- 550 6 Thorrington D, Eames K. Measuring health utilities in children and adolescents: A  
551 systematic review of the literature. *PLoS One* 2015; 10. DOI:10.1371/journal.pone.0135672.
- 552 7 Brooks R. EuroQol: the current state of play. *Health Policy* 1996; 37: 53–72.
- 553 8 EuroQol Group. EuroQol—a new facility for the measurement of health related quality of  
554 life. *Health Policy* 1990; 16: 199–208.
- 555 9 Wille N, Badia X, Bonsel G, et al. Development of the EQ-5D-Y: A child-friendly version  
556 of the EQ-5D. *Qual Life Res* 2010; 19: 875–86.
- 557 10 Zhao H, Green H, Lackenby A, et al. A new laboratory-based surveillance system  
558 (Respiratory Datamart System) for influenza and other respiratory viruses in England: Results  
559 and experience from 2009 to 2012. *Eurosurveillance* 2014; 19: 1–10.
- 560 11 DeVincenzo JP, Wilkinson T, Vaishnav A, et al. Viral load drives disease in humans  
561 experimentally infected with respiratory syncytial virus. *Am J Respir Crit Care Med* 2010; 182:  
562 1305–14.
- 563 12 Kravetz HM, Knight V, Chanock RM. Respiratory Syncytial Virus III: Production of illness  
564 and clinical observations in adult volunteers. *JAMA* 1961; 176: 657.
- 565 13 Hayward AC, Fragaszy E, Warren Gash C, et al. Cohort Profile: The Flu Watch Study.  
566 *Int J Epidemiol* 2016; Submitted: 1–11.
- 567 14 Fleming DM, Taylor RG, Lustig RL, et al. Modelling estimates of the burden of  
568 Respiratory Syncytial virus infection in adults and the elderly in the United Kingdom. *BMC Infect*  
569 *Dis* 2015; 15(1): 443. DOI:10.1186/s12879-015-1218-z

- 570 15 Taylor S, Taylor RJ, Lustig RL, et al. Modelling estimates of the burden of respiratory  
571 syncytial virus infection in children in the UK. *BMJ Open* 2016; 6: e009337.  
572 DOI:10.1186/s12879-015-1218-z
- 573 16 Department of Health. The Health Service (Control of Patient Information) Regulations.  
574 Bill Number 1438, Regulation 3. 2002.  
575 <http://www.legislation.gov.uk/ukxi/2002/1438/regulation/3/made>.
- 576 17 Heikkinen T, Silvennoinen H, Peltola V, et al. Burden of influenza in children in the  
577 community. *J Infect Dis* 2004; 190: 1369–73.
- 578 18 Munywoki PK, Koech DC, Agoti CN, et al. The Source of Respiratory Syncytial Virus  
579 Infection In Infants: A Household Cohort Study In Rural Kenya. *J Infect Dis* 2014; 209: 1685–92.
- 580 19 Roy LMC. Deriving health utility weights for infants with Respiratory Syncytial Virus  
581 (RSV). 2013.
- 582 20 Roy LMC, Bansback N, Marra C, Carr R, Chilvers M, Lynd LD. Evaluating preferences  
583 for long term wheeze following RSV infection using TTO and best-worst scaling. *Allergy Asthma*  
584 *Clin Immunol* 2014; 10: 2–3.
- 585 21 Greenough A, Alexander J, Burgess S, et al. Health care utilisation of prematurely born,  
586 preschool children related to hospitalisation for RSV infection. *Arch Dis Child* 2004; 89: 673–9.
- 587 22 Fragaszy EB, Warren-Gash C, White PJ, et al. Effects of seasonal and pandemic  
588 influenza on health-related quality of life, work and school absence in England: results from the  
589 Flu Watch cohort study. *Influenza Other Respi Viruses* 2018 Jan; 12(1): 171–182.  
590 DOI:10.1111/irv.12506.
- 591 23 Siddiqui M, Edmunds W. Cost-effectiveness of antiviral stockpiling and near-patient  
592 testing for potential influenza pandemic. *Emerg Infect Dis* 2008; 14(2): 267–274.  
593 DOI:10.3201/eid1402.070478
- 594 24 Thorrington D, Ramsay M, Van Hoek AJ, et al. The effect of measles on health-related  
595 quality of life: A patient-based survey. *PLoS One* 2014; 9. DOI:10.1371/journal.pone.0105153.
- 596 25 Jacoby P, Glass K, Moore HC. Characterizing the risk of respiratory syncytial virus in  
597 infants with older siblings: A population-based birth cohort study. *Epidemiol Infect* 2017 145(2):  
598 266–271
- 599 26 Munywoki PK, Koech DC, Agoti CN, Cane PA, Medley GF, Nokes J. Continuous  
600 invasion by respiratory viruses observed in rural households during a respiratory syncytial virus  
601 seasonal outbreak in coastal Kenya. *Clin Infect Dis* 2018; Apr: 1–52.

- 602 27 Munywoki PK, Koech DC, Agoti CN, *et al.* Frequent Asymptomatic Respiratory Syncytial  
603 Virus Infections during an Epidemic in a Rural Kenyan Household Cohort. *J Infect Dis* 2015;  
604 212: 1711–8
- 605 28 Ertmann RK, Siersma V, Reventlow S, Söderström M. Infants' symptoms of illness  
606 assessed by parents: Impact and implications. *Scand J Prim Health Care* 2011; 29: 67–74.

Prop persons less  
than 1 years of age

(A)

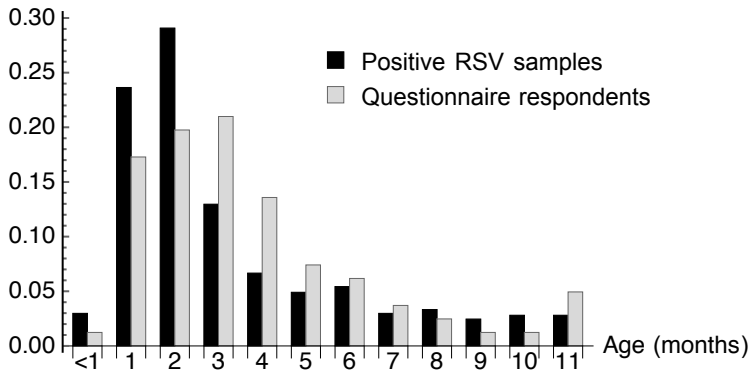

Prop persons less  
than 5 years of age

(B)

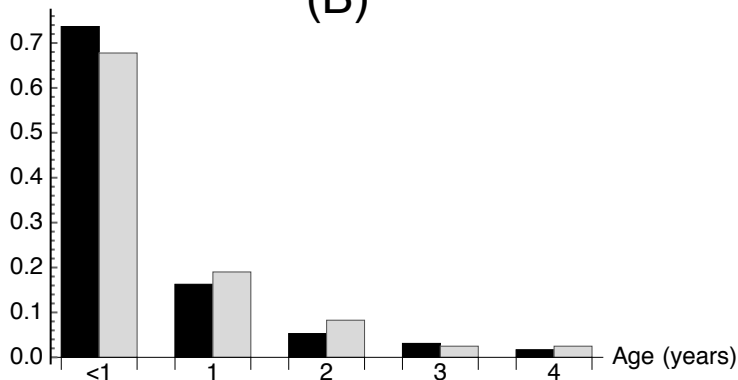

% of respondents aged 5–14 years old

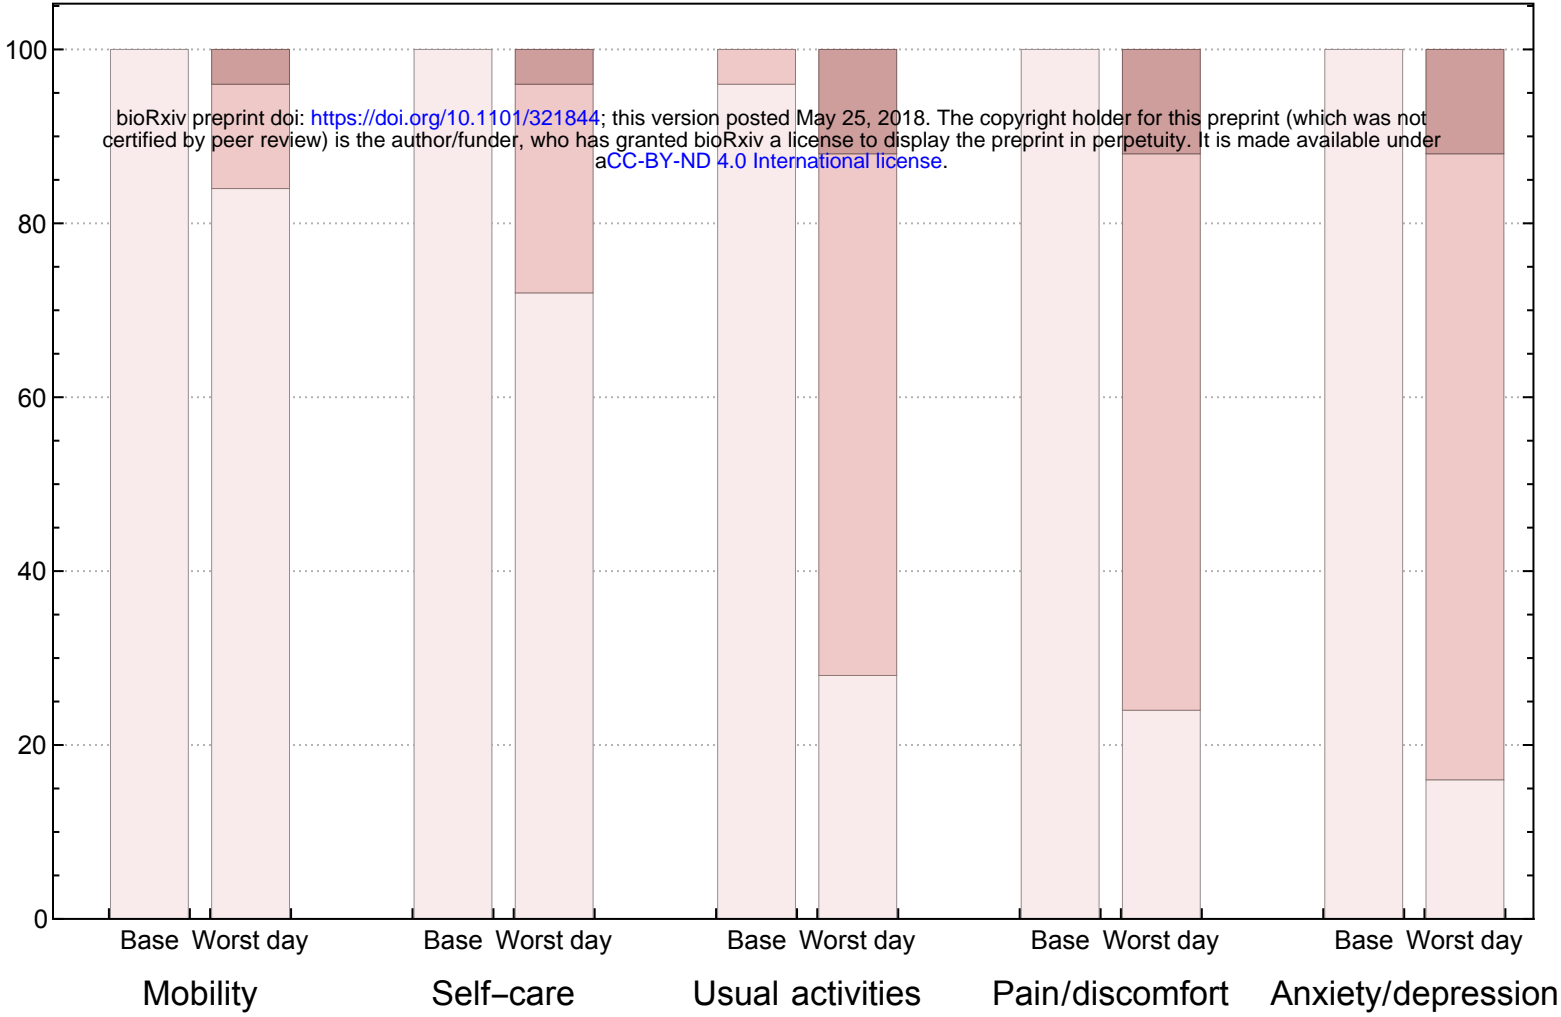

% of respondents ages 15 years or older

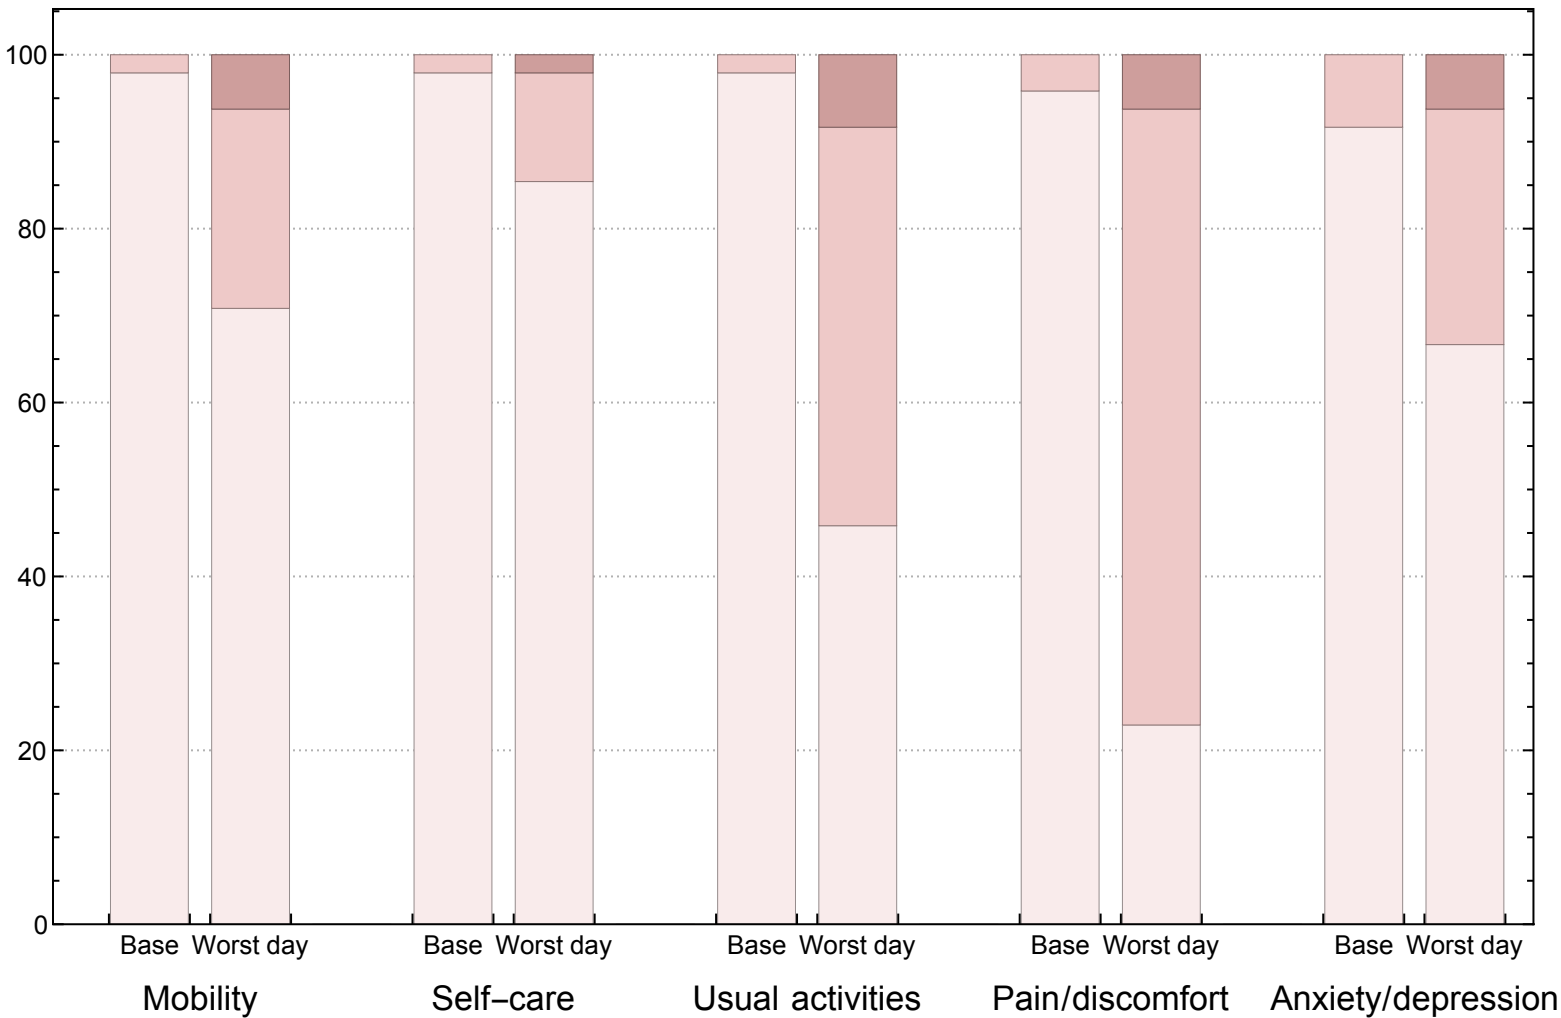

□ No problems    ■ Some problems    ■ Severe problems

Out[1199]=

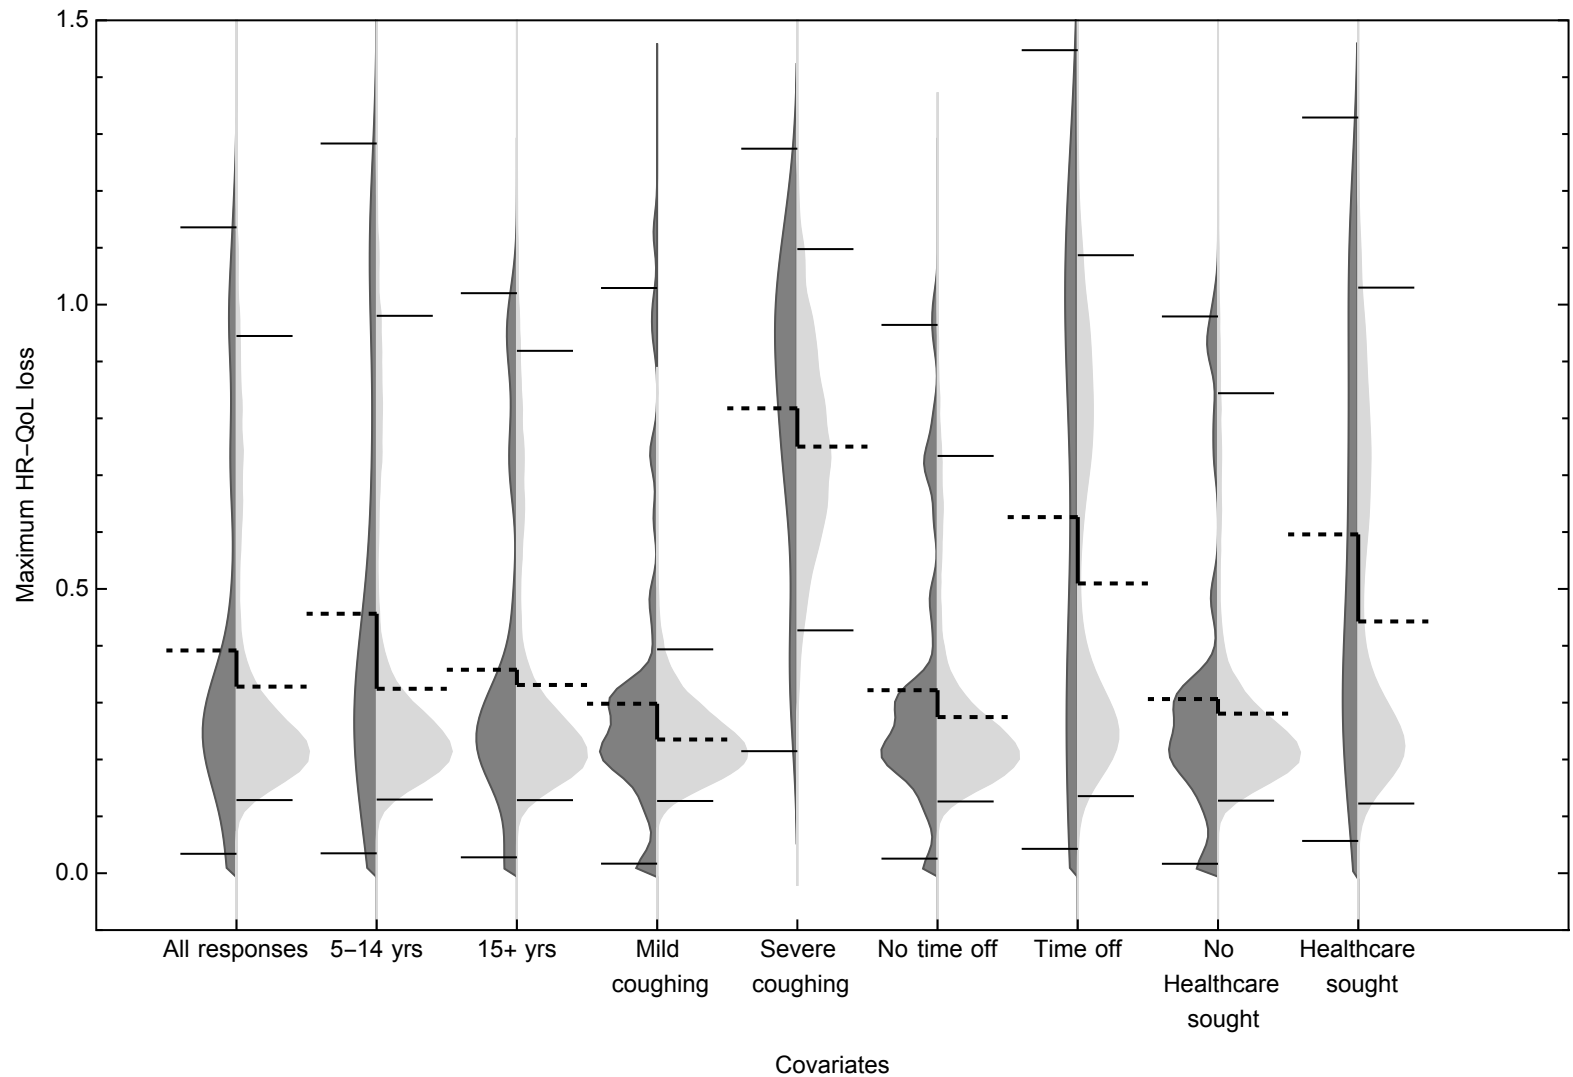

Source: https://www.biorxiv.org/content/10.1101/321844v1.full.pdf
